# Supplementary material for: Functional Analysis of Variants in Complement Factor I Identified in Age-Related Macular Degeneration and Atypical Hemolytic Uremic Syndrome
Source: Front Immunol. 2022 Jan 5;12:789897. doi: 10.3389/fimmu.2021.789897 (PMC8766660; doi:10.3389/fimmu.2021.789897)
Supplement: Supplementary file 4 [file Table_1.xlsx]

## Sheet: Sheet1
rs-number	cDNA (NM_000204.4)	Protein (numbering with signal peptide)	Protein (numbering without signal peptide)	Position (GRCh37 (hg19))	MAF (GNOMAD)	CADD_Phred	Domain	Phenotype	Reference	Remarks	Functional analyses (patient material)	Functional analyses (recombinant protein)
rs144082872	148C>G	Pro50Ala	Pro32Ala	110687890	9.55238e-05	24.8	FIMAC	AMD and aHUS	Bienaime et al. 2010; Nilsson et al. 2010; Fremeaux-Bacchi et al. 2013; Seddon et al. 2013; Bresin et al. 2013; Kavanagh et al. 2015; Osborne et al. 2018; de Jong et al. 2020; Hallam et al. 2020; Timmermans et al. 2021; Khan et al. 2021		Bienaime et al. 2010: one heterozygous carrier with slightly reduced levels, one heterozygous carrier with additional variant in CD46 with normal FI levels; Bresin et al. 2013: One carrier with additional p.R103W change in CD46 presented with normal serum levels in C3, FI and FH. Kavanagh et al. 2015: One heterozygous carrier with reduced FI serum levels, one heterozygous carrier with additional …	Bienaime et al. 2010: Expression in both supernatants and lysates is around 50% reduced compared to WT; Nilsson et al. 2010: Normal expression in both supernatants and lysates, normal function in fluid phase C3b and C4b degradation assays but reduced C3b degradation on sheep erythrocytes. de Jong et al. 2020: Expression comparable to WT after transfection of HEK293T cells.
rs773085612	1016G>A	Arg339Gln	Arg321Gln	110670683	3.97855e-06	24	Linker region	AMD	Zhan et al. 2013; Kavanagh et al. 2015; Fritsche et al. 2016; Geerlings et al. 2017; Geerlings et al. 2018; de Jong et al. 2020; Java et al. 2020; de Breuk et al. 2020		Kavanagh et al. 2015: One heterozygous carrier with normal FI serum levels; Java et al. 2020: One heterozygous carrier with normal FI levels in serum, but reduced generation of iC3b in the C3b degradation assay.	de Jong et al. 2020: Expression comparable to WT after transfection of HEK293T cells.
rs769419740	1019T>C	Ile340Thr	Ile322Thr	110670680	7.16087e-05	22.5	SP domain	AMD and aHUS	Geelen et al. 2007; Le Quintrec et al. 2008; Kavanagh et al. 2008; Westra et al. 2010; Geerdink et al. 2012; Seddon et al. 2013; Bresin et al. 2013; Haernyck et al. 2013; Kavanagh et al. 2015; Fritsche et al. 2016; Geerlings et al. 2018; Osborne et al. 2018; El Sissy et al. 2019; Hallam et al. 2020; de Jong et al. 2020	Haernyck et al. describe a case of recurrent aseptic meningo-encephelatis.	Geelen et al. 2007: One heterozygous patient with normal FI levels, low normal function for the alternative pathway and normal function of the classical pathway; Le Quintrec et al. 2008: One heterozygous carrier with elevated FI levels in plasma; Haerynck et al. 2013: One compound heterozygous carrier with additional p.Asp524Val change presented with normal FI levels but loss of Alternative Pathw…	Kavanagh et al. 2008: Normal secretion, but loss of function in both C3b and C4b degradation assays. de Jong et al. 2020: Expression comparable to WT after transfection of HEK293T cells.
rs1312234258	1025G>A	Gly342Glu	Gly324Glu	110670674	1.19343e-05	25.3	SP domain	AMD and aHUS	Zhan et al. 2013; Fremeaux-Bacchi et al. 2013; Gaggl et al. 2018; Osborne et al. 2018; de Jong et al. 2020		de Jong et al. 2020: Two heterozygous carriers with normal plasma FI levels.	de Jong et al. 2020: Expression comparable to WT after transfection of HEK293T cells.
	1045G>A	Gly349Arg	Gly331Arg	110670477		31	SP domain	aHUS	Noris et al. 2010; Bresin et al. 2013; Osborne et al. 2018; de Jong et al. 2020			de Jong et al. 2020: Expression comparable to WT after transfection of HEK293T cells.
rs765956155	1421G>A	Arg474Gln	Arg456Gln	110667386	4.77509e-05	22.4	SP domain	AMD and aHUS	Kavanagh et al. 2015; Fritsche et al. 2016; Geerlings et al. 2017; Szarvas et al. 2016; Osborne et al. 2018; de Jong et al. 2020		Szarvas et al. 2016: One heterozygous carrier with additional 772G>A change had reduced FI, C3 and FB levels, and no sC5b-9 (Wieslab assay) family members with 772G>A change also showed reduced FI levels, but the father with the 1421G>A change showed normal FI levels (no data shown, only described in text). de Jong et al. 2020: One heterozygous carrier with normal FI levels in plasma.	de Jong et al. 2020: Expression comparable to WT after transfection of HEK293T cells.
rs754972981	1429G>C	Asp477His	Asp459His	110667378	1.99005e-05	33	SP domain	AMD	Seddon et al. 2013; Kavanagh et al. 2015; Fritsche et al. 2016; de Jong et al. 2020			de Jong et al. 2020: Expression comparable to WT after transfection of HEK293T cells.
	1459G>T	Gly487Cys	Gly469Cys	110663722		25.9	SP domain	AMD	Seddon et al. 2013; Kavanagh et al. 2015; de Jong et al. 2020; Java et al. 2020		Kavanagh et al. 2015: One heterozygous carrier with normal FI levels; Java et al. 2020: One heterozygous carrier with normal FI levels in serum, but reduced generation of iC3b in the C3b degradation assay.	de Jong et al. 2020: Expression comparable to WT after transfection of HEK293T cells.
rs770828632	1534G>A	Gly512Ser	Glu494Ser	110663647	7.96153e-06	33	SP domain	AMD	Seddon et al. 2013; Zhan et al. 2013; Kavanagh et al. 2015; Fritsche et al. 2016; de Jong et al. 2020			de Jong et al. 2020: Expression comparable to WT after transfection of HEK293T cells.
rs7437875	1642G>C	Glu548Gln	Glu530Gln	110662159	0.000820722	26.6	SP domain	AMD and aHUS	Zhan et al. 2013; Geerlings et al. 2018; Osborne et al. 2018; de Jong et al. 2020		de Jong et al. 2020: One heterozygous carrier with normal FI levels in plasma.	de Jong et al. 2020: Expression comparable to WT after transfection of HEK293T cells.
rs200973120	1709G>C	Ser570Thr	Ser552Thr	110662092	5.65763e-05	23.6	SP domain	AMD and aHUS	Geerlings et al. 2018; Osborne et al. 2018; de Jong et al. 2020		de Jong et al. 2020: Two heterozygous carriers with normal FI levels in plasma.	de Jong et al. 2020: Expression comparable to WT after transfection of HEK293T cells.
